# Supplementary material for: Copb2 is essential for embryogenesis and hypomorphic mutations cause human microcephaly
Source: Oxford University Press journal article supplement (doi:10.1093/hmg/ddx362), 2017-09-18
Supplement: ddx362_supplemental.docx [file ddx362_supplemental.docx]

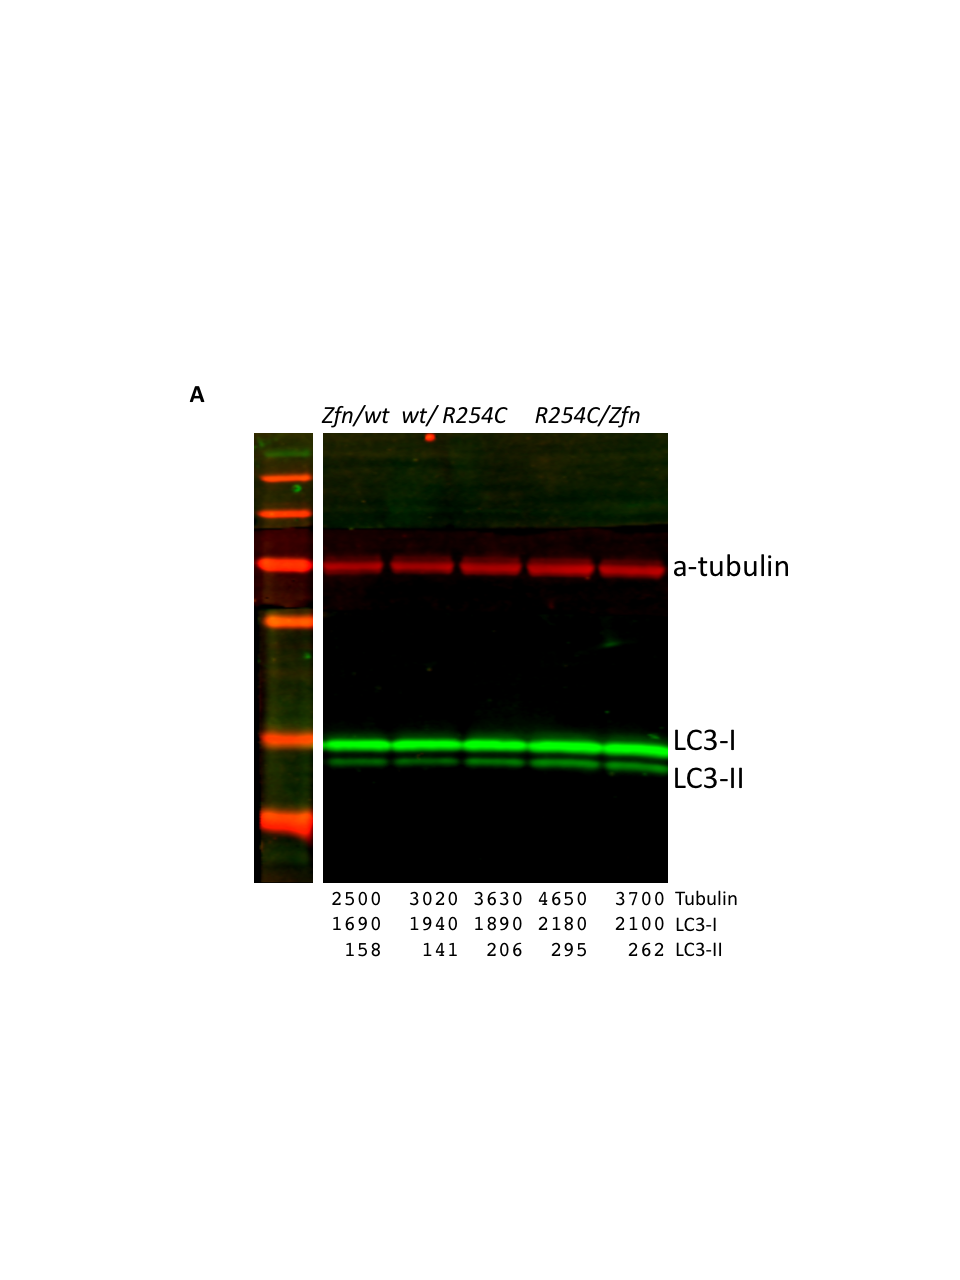


**Supplemental Figure 1. LC3 levels in *Copb2R254C/Zfn* mutants.** Immunoblotting for LC3I and LC3II normalized to alpha-tubulin show no differences in LC3 ratio between mutant and wild type embryos.


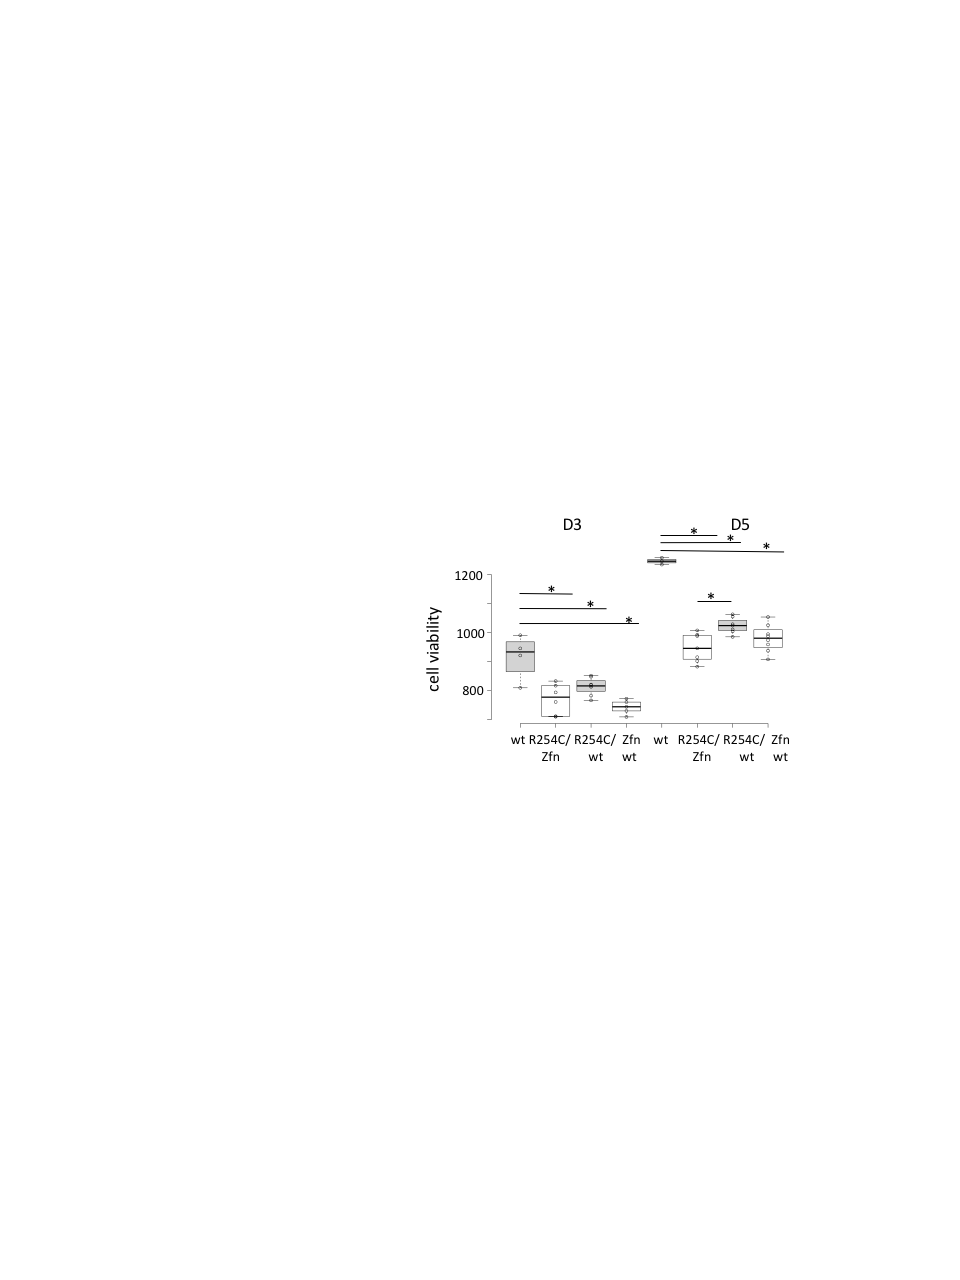


**Supplemental Figure 2. Loss of COPB2 compromises neurosphere growth.** Mouse neurospheres from *Copb2wt/wt (*wt*), Copb2R254C/Zfn (*R254C/Zfn*)* , *Copb2R254C/wt (*R254C/wt*)* and *Copb2Zfn/wt (*Zfn/wt*)*. All *Copb2* edited genotypes show reduced proliferation as compared to wild-type at both D3 and D5. At D5, R254C/Zfn neurospheres have significantly fewer cells than R254C/wt neurospheres.

**Table 5.** Primers used in this study.

| h*COPB2*F | tgtaaaacgacggccagtggtcatta |
| --- | --- |
| h*COPB2*R | tcacacaggaaacagctatgacgctc |
| *Copb2 Zfn* guides |  |
| ZFN Primer F | taaacccgattttggagctg |
| ZFN Primer R | acagtgttcagcacagtggg |
| *Copb2 R254C* CRISPR guides |  |
| Guide 1 | gaagatggaacagtacgtatt |
| Guide 2 | gtttggcattcaagcacctac |
| Guide 3 (used) | gtctggcattctagcacctac |
| *Copb2* CRISPR donor oligonucleotide | Tttattttggatgttcatatccagagggaatgtttacattgttgatttttag  GAACCGTATGTATATGGCACTCAAGTACCTAT  CGACTTGAGAGCACGCTGAATTACGGAATGG  AGAGGGTG |
| Genotyping *Copb2Zfn* allele |  |
| m*Copb2 Zfn F* | atctatgggggcttcttgct |
| m*Copb2 Zfn R* | tgacacgagggactcagaca |
| Genotyping *Copb2CRISPR* alleles |  |
| m*Copb2* CRISPR flank F | cggcttccagtagctcattc |
| m*Copb2* CRISPR flank R | atctttccattggcatccat |
